# Supplementary material for: Cdc42 Couples T Cell Receptor Endocytosis to GRAF1-Mediated Tubular Invaginations of the Plasma Membrane
Source: MDPI journal article supplement (doi:10.3390/cells8111388), 2019-11-04
Supplement: s1 [file s1]

Cdc42 couples T cell receptor endocytosis to GRAF1-mediated tubular invaginations of the plasma membrane  
Pascal Rossatti et *al.*

SUPPLEMENTAL INFORMATION

Supplemental Figure S1

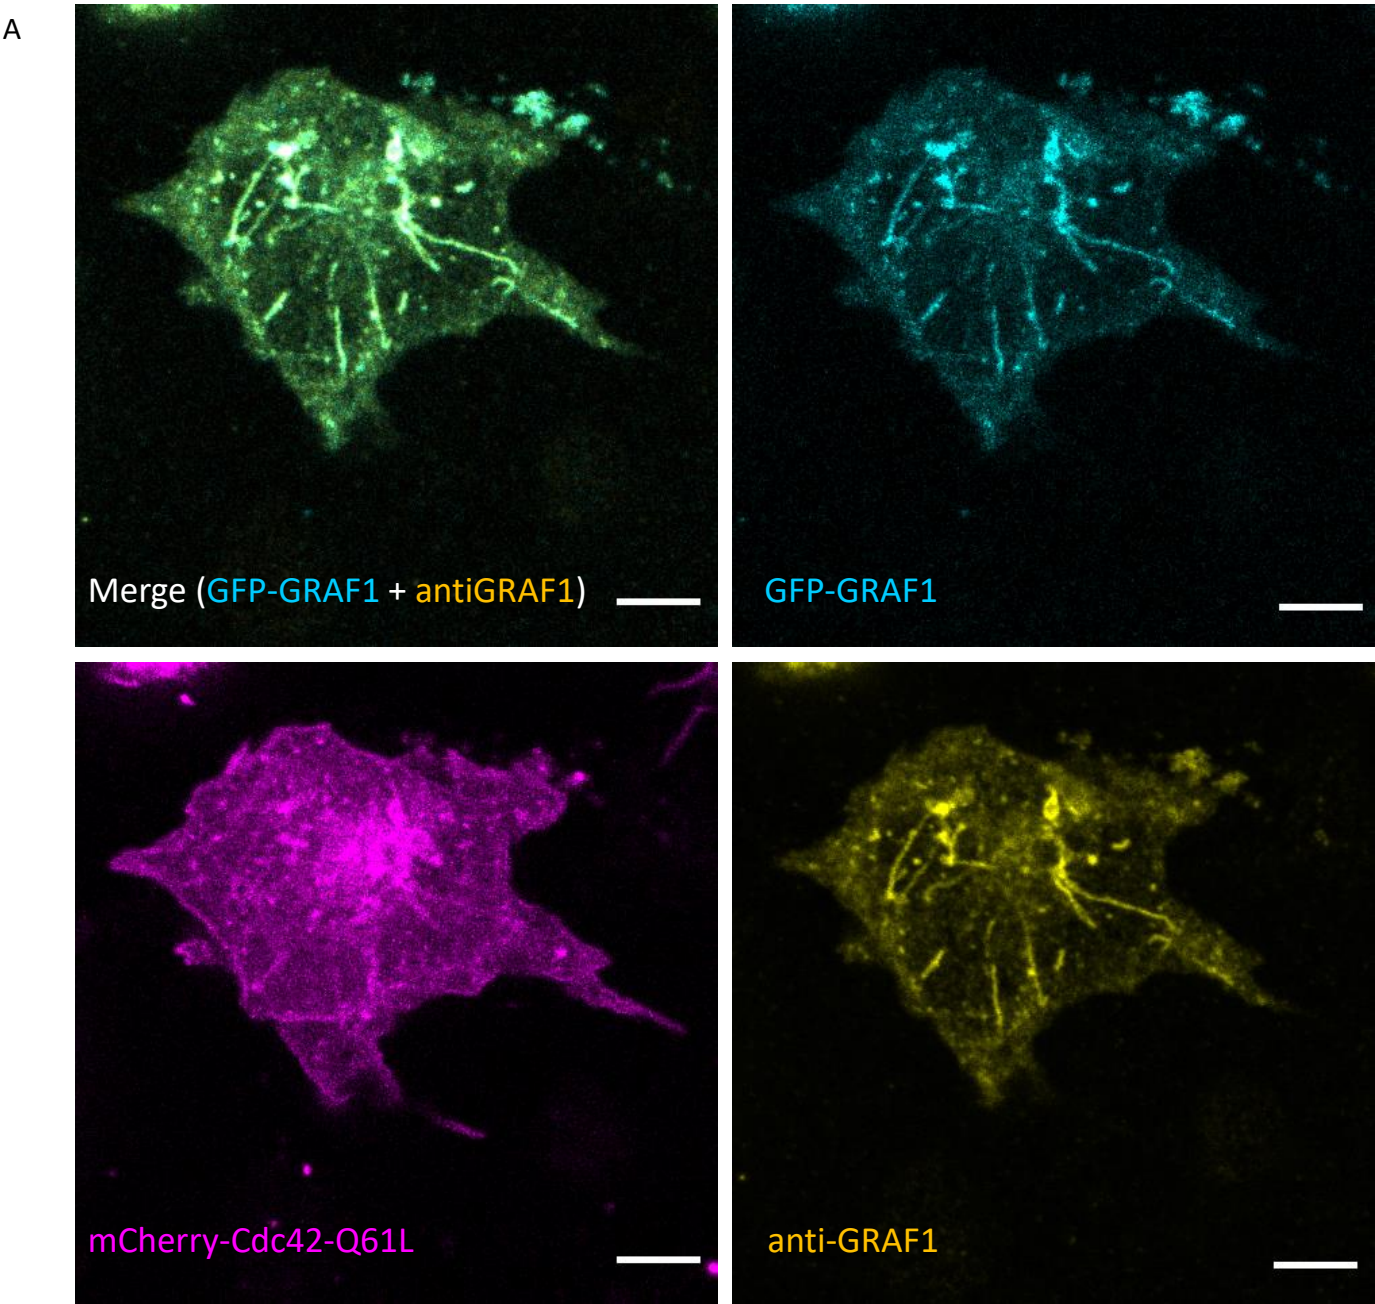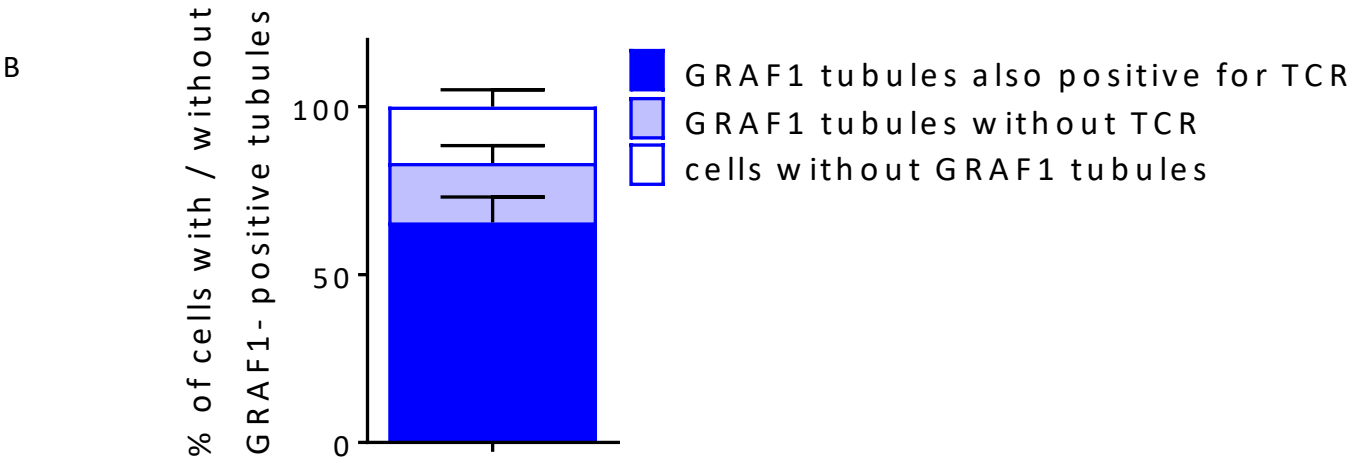



Supplemental Figure S2

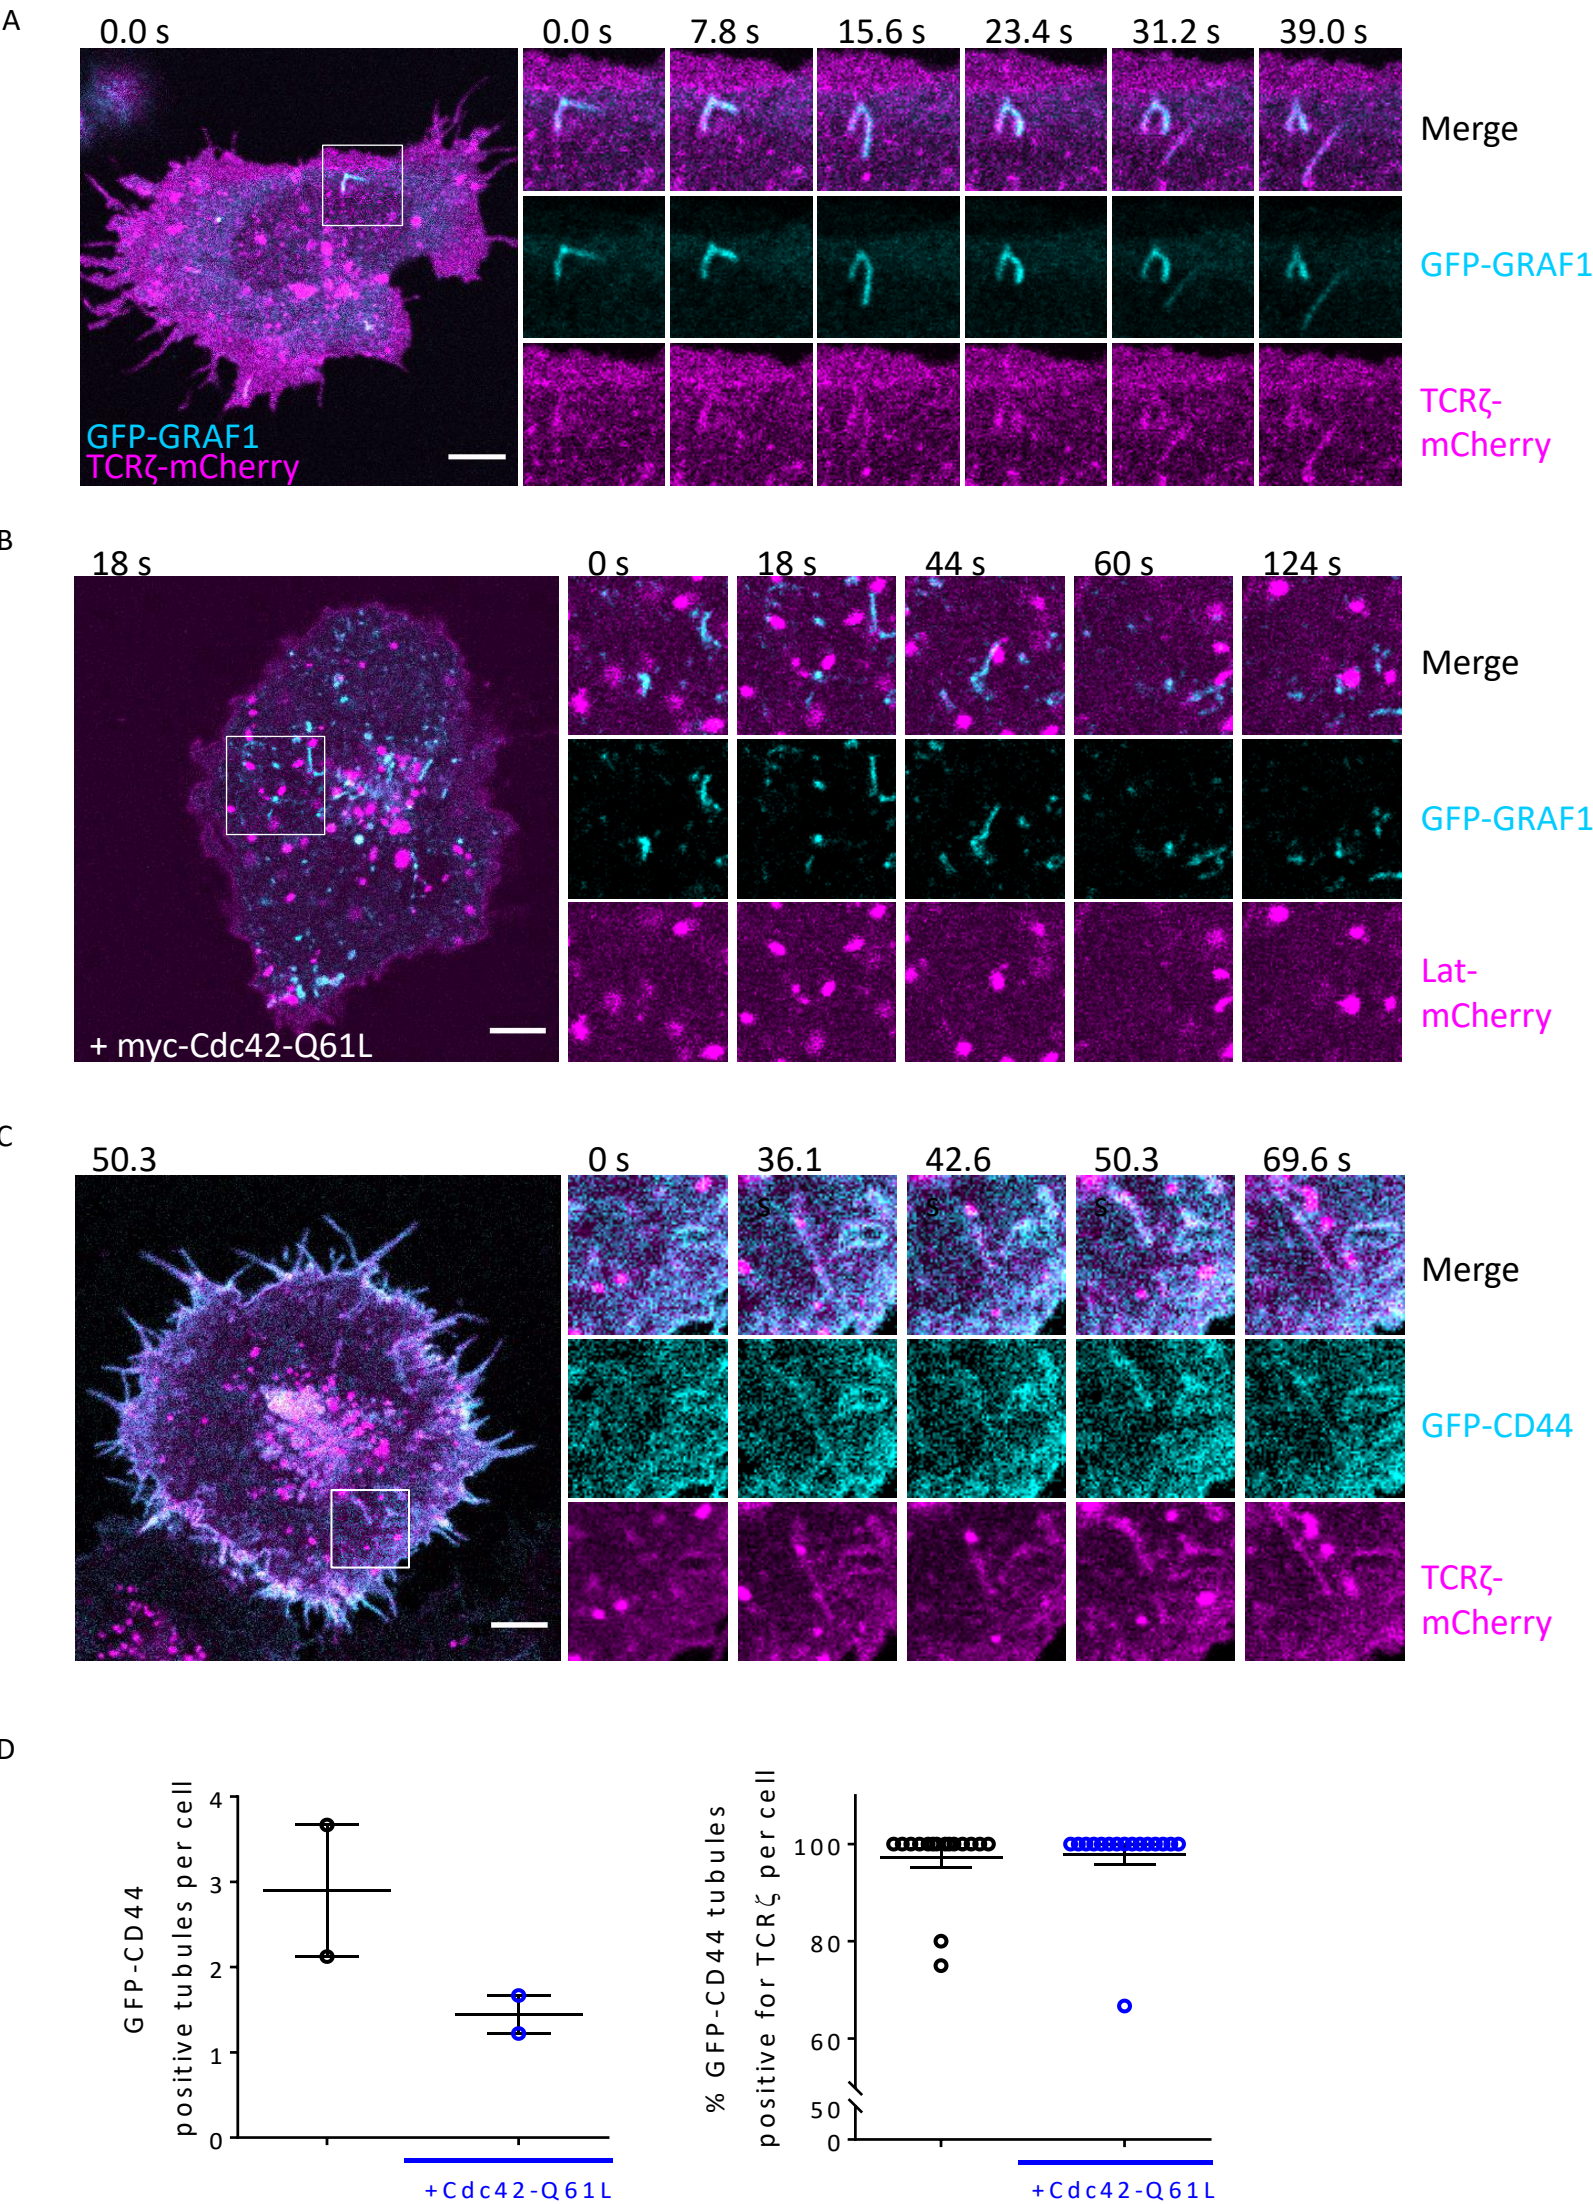

Supplemental Figure S3

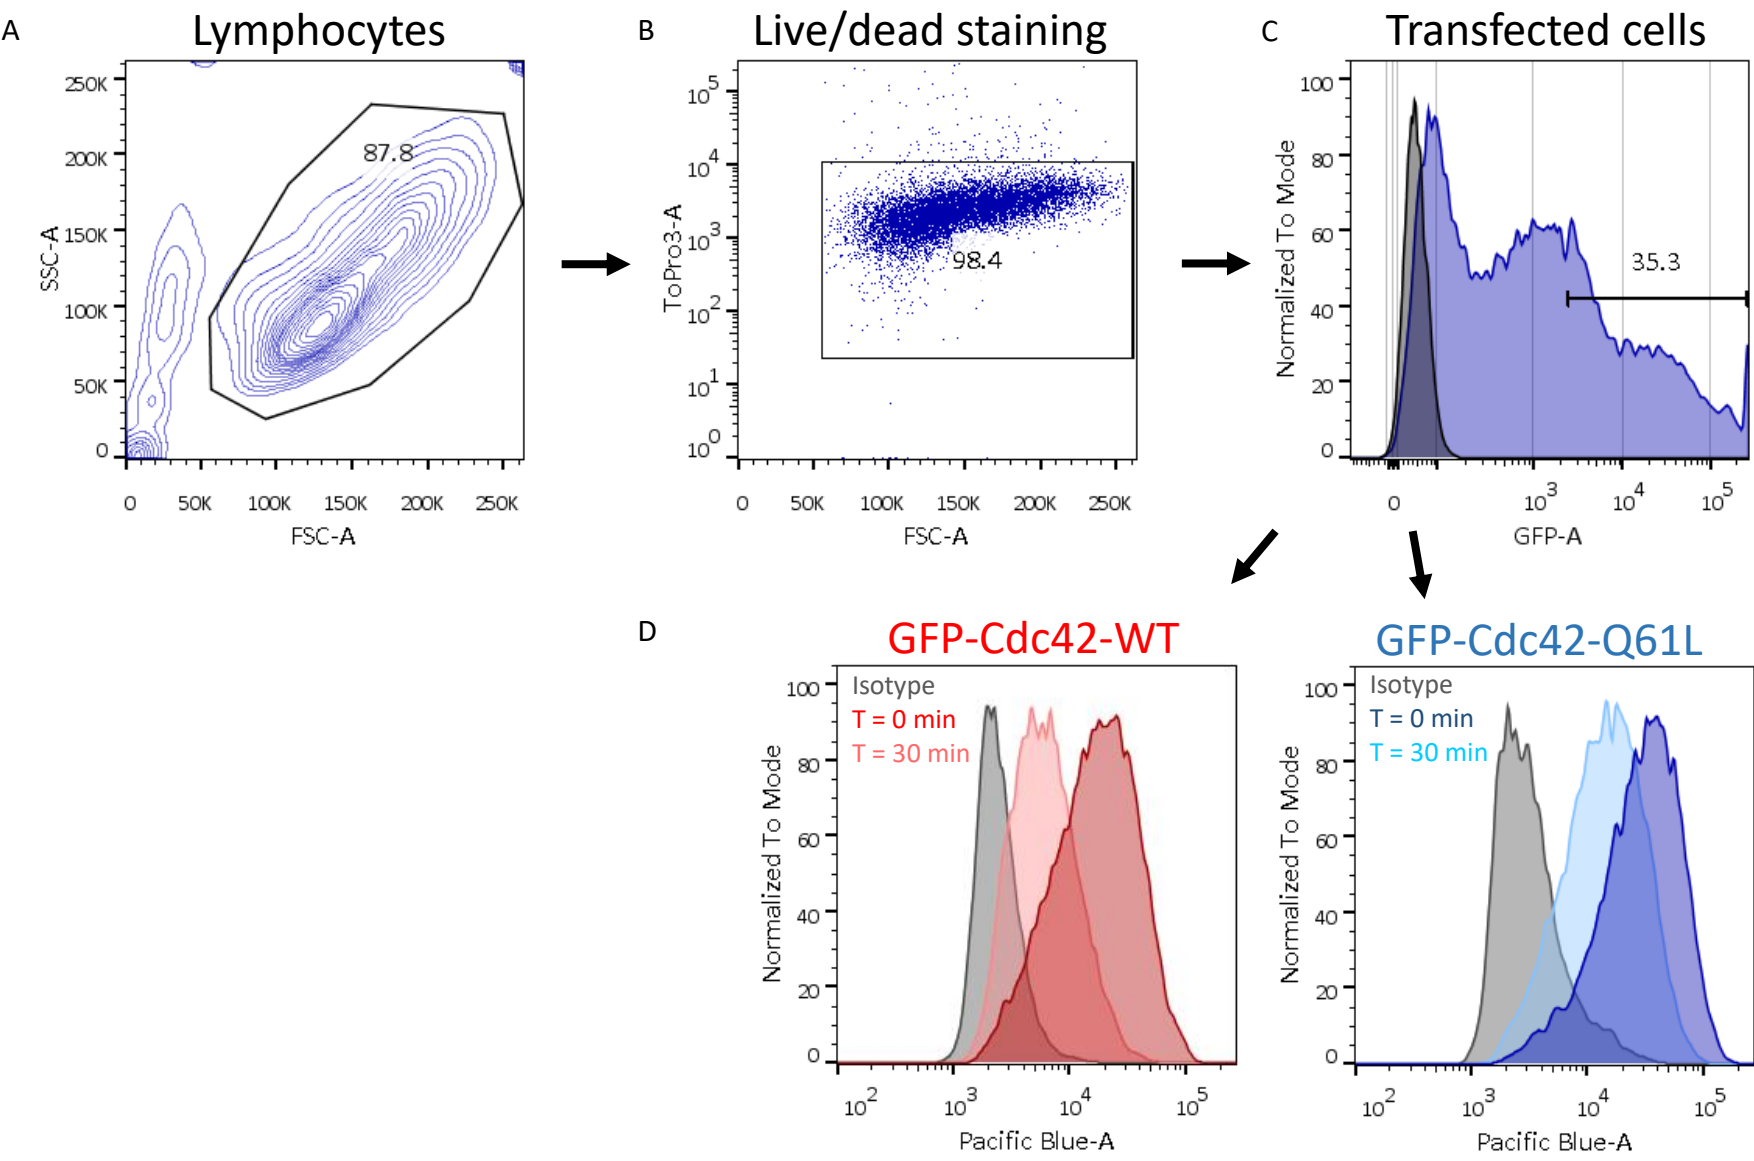

Supplemental Figure S4

A

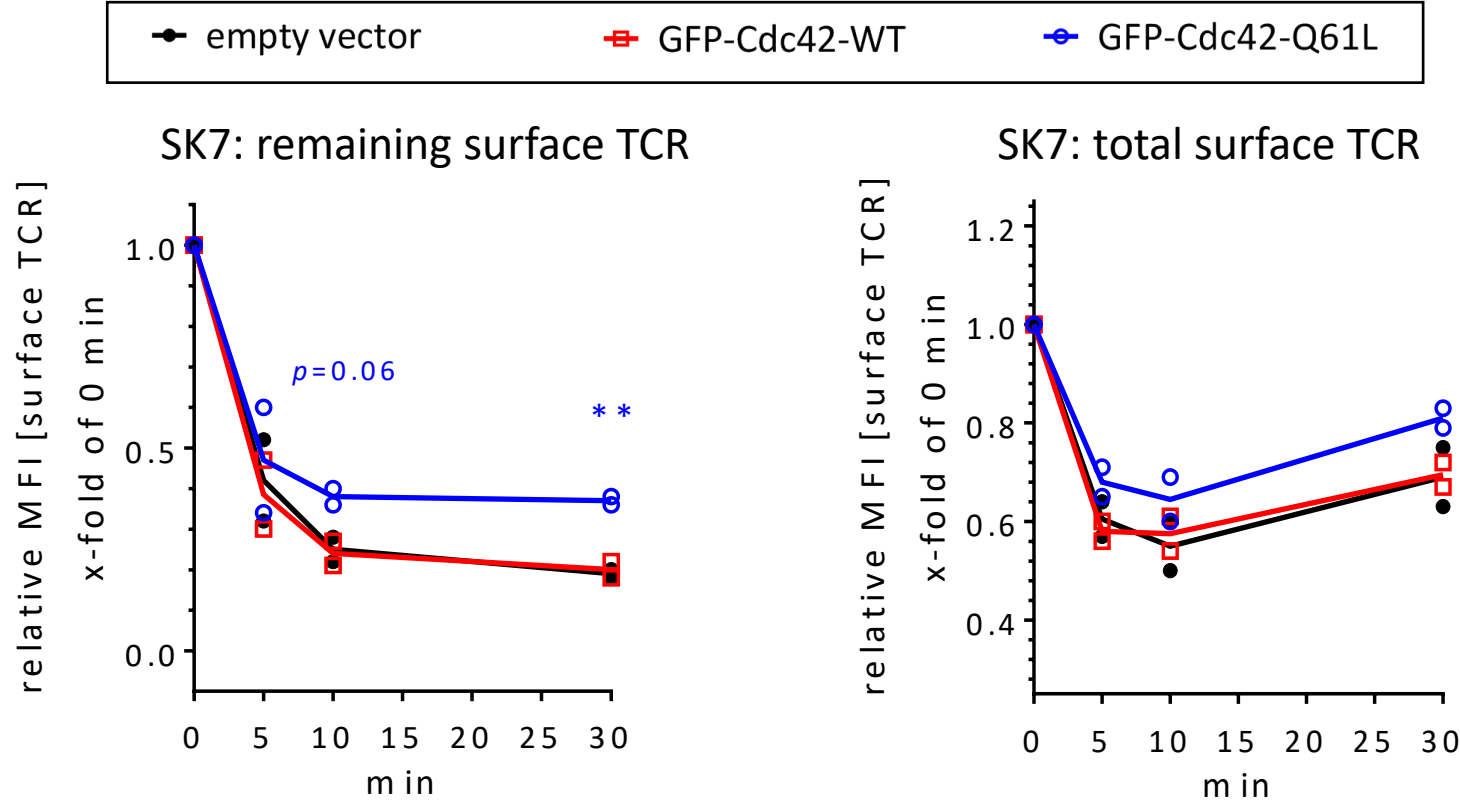

B

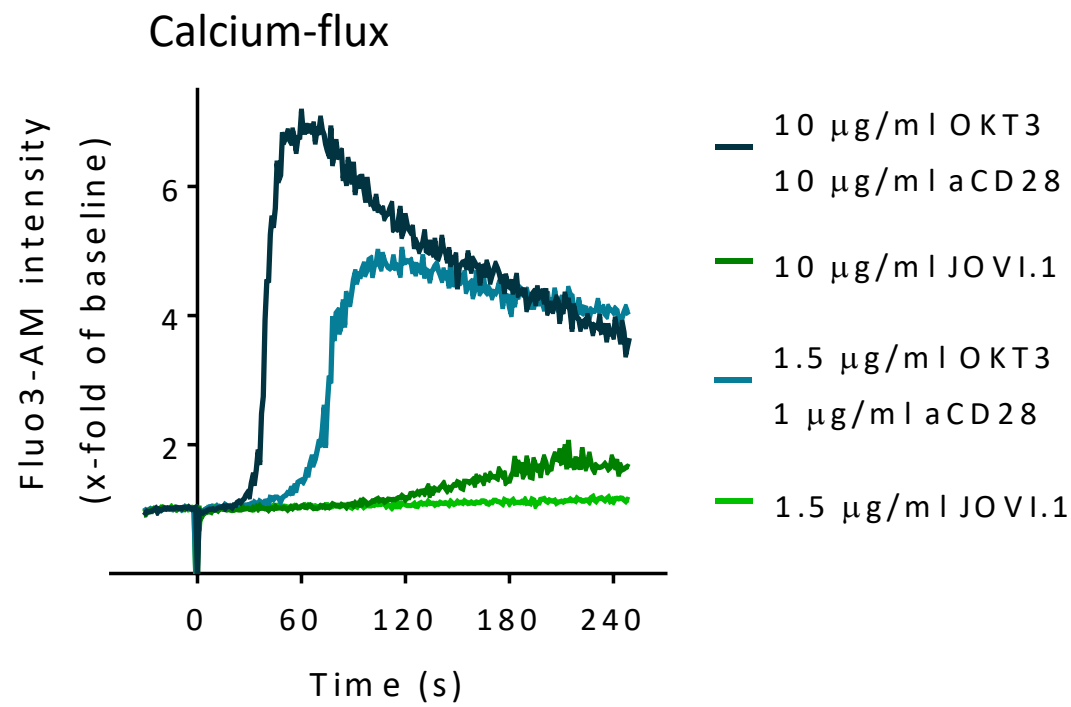



## Supplementary Materials

**Supplemental Figure S1.** (A) Commercial anti-GRAF1 labels GFP-GRAF1-positive tubules. Jurkat T cells expressing GFP-GRAF1 and mCherry-Cdc42-Q61L were activated on coverslips coated with functional antibodies against CD3 $\epsilon$  and CD28 for 10 min and fixed with 3.7% PFA. GFP-GRAF1 tubules were fully detected by immunostaining using a commercial antibody against GRAF1. Images representative maximum intensity projections of at least three independent experiments. Scale bar: 5  $\mu$ m. (B) Quantification of the number of Jurkat T cells transfected with TCR $\zeta$ -mCherry, GFP-GRAF1 and myc-Cdc42-Q61L that displayed at least one GRAF1 positive tubule containing TCR $\zeta$ , or only GRAF1 positive tubules with absent TCR $\zeta$ -mCherry signal, or no GRAF1 positive tubules at all.

**Supplemental Figure S2.** (A) Representative time series of Jurkat T cells expressing GFP-GRAF1 and TCR $\zeta$ -mCherry that were activated on coverslips coated with functional antibodies against CD3 $\epsilon$  and CD28 and imaged live at 37°C. (B) Representative time series of Jurkat T cells expressing myc-Cdc42-Q61L, GFP-GRAF1 and Lat-mCherry that were activated and imaged as in A. (C) Representative time series of Jurkat T cells expressing GFP-CD44 and TCR $\zeta$ -mCherry that were activated and imaged as in A (D) Quantification of the cells as shown in C and with or without expression of Cdc42-Q61L (n=23 and 30 cells from 2 independent experiments). Small horizontal lines indicate mean ( $\pm$ SEM). Scale bar: 5  $\mu$ m.

**Supplemental Figure S3.** Gating strategy for the flow cytometry based TCR/Tf internalisation assay. (A) Lymphocytes were gated based on FCS/SSC. (B) TO-PRO-3 positive (dead) cells were excluded and (C) GFP-positive (transfected) cells were selected. (D) For transfected cells Pacific Blue was plotted as histogram and mean fluorescence intensity was determined. Note higher Pacific Blue-MFI of cells expressing GFP-Cdc42-Q61L (dark blue) compared to GFP-Cdc42-WT (dark red) and impaired shift of the peak at 30 min in cells expressing GFP-Cdc42-Q61L (light blue) compared to GFP-Cdc42-WT (light red).

**Supplemental Figure S4.** (A) Remaining TCR-CD3 at the cell surface detected by an antibody against CD3 $\epsilon$  (clone SK7) after activation-induced internalisation in cells expressing an empty vector, GFP-WT-Cdc42 or GFP-Cdc42-Q61L. (B) Flow cytometry measurements of calcium flux based on Fluo-3-AM fluorescence in Jurkat T cells stimulated with soluble antibodies (anti-CD3 $\epsilon$ , clone OKT3 and anti-CD28 or anti TCR $\beta$ , clone JOVI.1) at the indicated concentrations. Data shown are representative of two independent experiments.

**Video S1.** Related to Fig2A: Jurkat T cell expressing myc-Cdc42-Q61L, GFP-GRAF1 and TCR $\zeta$ -mCherry that was activated on coverslips coated with functional antibodies against CD3 $\epsilon$  and CD28 and imaged live at 37°C. Scale bar: 5  $\mu$ m.

**Video S2.** Related to Fig2B: Jurkat T cell expressing myc-Cdc42-Q61L and GFP-GRAF1, incubated with Alexa546-Tf for 10 min and imaged live on a coverslip coated with functional antibodies against CD3 $\epsilon$  and CD28 at 37°C, as shown in Fig2B. Scale bar: 5  $\mu$ m.

**Video S3.** Related to Fig2D: Dynamics of the TCR $\zeta$ -PAmCherry signal before, during and after photoactivation in a Jurkat T cell expressing myc-Cdc42-Q61L, GFP-GRAF1 and TCR $\zeta$ -PAmCherry activated on an antibody coated coverslip and imaged at 37°C with TIRF microscopy, as shown in Fig2D. Scale bar: 5  $\mu$ m.
